# Supplementary material for: Inference of R0 and Transmission Heterogeneity from the Size Distribution of Stuttering Chains
Source: PLOS journal article supplement (doi:10.1371/journal.pcbi.1002993), 2013-05-02
Supplement: S3 (10.1371/journal.pcbi.1002993.s003) [file journal.pcbi.1002993.s003]

Matlab functions for:

1. Simulating the size of observed transmission chains when the offspring distribution is a negative binomial and observation of cases occurs with either an independent or chain-size dependent probability.
2. Calculating the probability density function for the observed size of simulated chains.

%%%%%%%%%%%%%%%%%%%%%%%%%%%%%%%%%%%%%%%%%%%%%%%%%%%%%%%%%%%%%%%%%%%%%%%%%

```
function chain_dist = chain_distribution(r0,k,pobs,max_outbreak_size,num_sim)
% Generates disease outbreak data (i.e. the distribution for the observed
% size of transmission chains)
%
% r0 = mean secondary infections per infected individual
% k = dispersion parameter of offspring distribution
% pobs = Observiaton bias
%   pobs(1) = mode of bias [0 perfect surveillance, 1 i.i.d. bias
%                       2 weighted cluster bias]
%   pobs(2) = individual level probability of observation
% num_sim = number of chains simulated
%
% chain_dist(i,1) = number of chains of size i
% chain_dist(i,2) = number of chains of size i that did not go extinct
%   before simulation ended

chain_dist=zeros(1,2);

n = 0; % Counts how many
while (n < num_sim)
    popsize = 1; % Number of cases that can still transmit
    outbreak_size = popsize; % Running count of case in a chain
    while (popsize > 0 && outbreak_size < max_outbreak_size)
        nb_dist = gen_nb_dist(r0,k,popsiz,1);
        popsize = sum(nb_dist);
        outbreak_size = outbreak_size + popsize;
    end
    if pobs(1) == 1 % i.i.d case
        outbreak_size = binornd(outbreak_size,pobs(2));
    elseif pobs(1) == 2 % weighted cluster case
        if(rand() < (1-pobs(2))^outbreak_size)
            outbreak_size= 0;
        end
    end
    end

    % Record outbreak_size
    if (outbreak_size > 0)
        if (outbreak_size > size(chain_dist,1));
            chain_dist(outbreak_size,1) = 0;
        end
        chain_dist(outbreak_size,1) = chain_dist(outbreak_size,1)+ 1;
        if (popsize> 0)
            chain_dist(outbreak_size,2) = chain_dist(outbreak_size,2)+ 1;
        end
        n = n+1;
    end
end
end
```

```

end

function nb_dist = gen_nb_dist(r0,k,m,n)
    % Chooses an m by n array of integers according to a negative binomial
    % distribution
    %
    % r0 = mean
    % k = dispersion parameter as defined in Jamie's '05 paper
    %   k =1 --> geometric dist w/ Var = r0(r0 +1)
    %   k = Inf --> Poisson dist w/ Var = r0
    %
    % nb_dist = output

    nb_dist = poissrnd(gamrnd(k,r0/k,m,n));

    % Note that matlab uses r,p for the negative binomial parameters where r
    % is 'k' and p is 'k/(r0+k)'
end

%%%%%%%%%%%%%%%%%%%%%%%%%%%%%%%%%%%%%%%%%%%%%%%%%%%%%%%%%%%%%%%%%%%%%%%%

function chain_pdf = calc_chain_pdf_forSup(r0,k,pobs_arr,outbreak_size_limit)
    % Calculates the expected pdf for the distribution of outbreak sizes.
    %   pobs_arr(1) = mode of bias [0 perfect surveillance, 1 i.i.d. bias
    %                                     2 weighted cluster bias]
    %   pobs_arr(2) = individual level probability of observation

    pobs_mode = pobs_arr(1);
    pobs = pobs_arr(2);

    if(pobs_mode == 1 && pobs < 1)
        % Large chains can be as observed chains and so we'll have to compute
        % the 'true' pdf for chains that are larger than the maximum
        % observable size. The choice of how large to calculate is somewhat
        % arbitrary.
        num_calc = min(100*outbreak_size_limit,1e4);
    else
        num_calc = outbreak_size_limit;
    end

    % Outline of method:
    % - Determine true pdf of chains
    % - Adjust for imperfect observation

    if r0 == 0
        true_chain_pdf = zeros(1,num_calc);
        true_chain_pdf(1) = 1;
    else
        j = 1:num_calc;
        log_real_chain_pdf = gammaln(k*j+j-1)-gammaln(k*j)-gammaln(j+1)+(j-
1)*log(r0/k)-(k*j+j-1)*log(1+r0/k);
        true_chain_pdf = exp(log_real_chain_pdf);
    end
end

```

```

if (pobs_mode == 0 || pobs == 1)
    chain_pdf = true_chain_pdf;
    return;
end

j=1:num_calc;
% Calculate probability a chain is not observed at all
prob0 = sum(exp(j*log(1-pobs)+log(true_chain_pdf)));
denominator = 1- prob0;
switch pobs_mode
    case 1 % i.i.d. case
        for jj = 1:outbreak_size_limit
            l = jj:length(true_chain_pdf);
            numerator(jj) = exp(jj*log(pobs/(1-pobs))-
gammaaln(jj+1))*sum(exp(log(true_chain_pdf(l))+l*log(1-pobs)+gammaaln(l+1)-
gammaaln(l+1-jj))));
        end
        chain_pdf = numerator/denominator;
    case 2 % weighted cluster
        j = 1:length(true_chain_pdf);
        numerator = exp(log(true_chain_pdf(j))).*(1-(1-pobs).^j);
        chain_pdf = numerator/denominator;
end
end

```
